# Supplementary material
Source: publisher figshare collection journal article supplement (https://gsajournals.figshare.com/ndownloader/files/23187035)
Supplement: Supplementary file 1 [file 23187035]

| **Sample Name** | **Sex** | **Collection Locality** | **Coordinates** | **SRA Accession Number** |
| --- | --- | --- | --- | --- |
| *Amphizoa insolens* DNA3784 | Female | USA: Oregon: Sheep Creek | 44.4127 N 122.2092 W | SRR8518617 |
| *Bembidion* sp. nr. *transversale* DNA2544 | Male | USA: Oregon: Corvallis | 44.5491 N 123.2449 W | SRR8518612 |
| *Bembidion* sp. nr. *transversale* DNA5427 | Male | USA: Oregon: Corvallis | 44.5478 N 123.2430 W | SRR8518625 |
| *Bembidion* sp. nr. *transversale* DNA5428 | Male | USA: Oregon: Corvallis | 44.5478 N 123.2430 W | SRR8518626 |
| *Bembidion* sp. nr. *transversale* DNA5433 | Male | USA: Oregon: Corvallis | 44.5478 N 123.2430 W | SRR8518631 |
| *Bembidion lividulum* DNA4161 | Male | USA: California: Ebbetts Pass | 38.5445 N 119.8115 W | SRR8518619 |
| *Chlaenius sericeus* DNA4821 | Male | USA: California: Wilcox Ranch | 38.2497 N 121.8783 W | SRR8518613 |
| *Chlaenius sericeus* JMP068 | Male | USA: Oregon: Prineville Reservoir | 44.1294 N 120.6971 W | SRR8518630 |
| *Chlaenius sericeus* JMP069 | Male | USA: Oregon: Prineville Reservoir | 44.1294 N 120.6971 W | SRR8518629 |
| *Chlaenius sericeus* JMP070 | Male | USA: Oregon: Prineville Reservoir | 44.1294 N 120.6971 W | SRR8518623 |
| *Chlaenius sericeus* JMP071 | Male | USA: Oregon: Prineville Reservoir | 44.1294 N 120.6971 W | SRR8518624 |
| *Lionepha* *tuulukwa* DNA3782 | Male | USA: Oregon: Marys Peak | 44.4746 N 123.5286 W | SRR8518614 |
| *Lionepha* *tuulukwa* DNA5435a | Male | USA: Oregon: Marys Peak | 44.4748 N 123.5280 W | SRR8518632 |
| *Lionepha* *tuulukwa* DNA5436a | Male | USA: Oregon: Marys Peak | 44.4748 N 123.5280 W | SRR8518622 |
| *Omoglymmius hamatus* DNA3783 | Male | USA: California: Brightman Flat Cpgd | 38.3506 N 119.8451 W | SRR8518618 |
| *Pterostichus melanarius* DNA3787 | Male | USA: Oregon: Corvallis | 44.5488 N 123.2482 W | SRR8518615 |
| *Pterostichus melanarius* JMP059 | Male | USA: Oregon: Chip Ross Park | 44.6089 N 123.2813 W | SRR8518620 |
| *Pterostichus melanarius* JMP060 | Male | USA: Oregon: Chip Ross Park | 44.6089 N 123.2813 W | SRR8518621 |
| *Pterostichus melanarius* JMP061 | Male | USA: Oregon: Chip Ross Park | 44.6089 N 123.2813 W | SRR8518627 |
| *Pterostichus melanarius* JMP062 | Male | USA: Oregon: Chip Ross Park | 44.6089 N 123.2813 W | SRR8518628 |
| *Trachypachus gibbsii* DNA3786 | Male | USA: California: Carson Spur | 38.7047 N 120.1048 W | SRR8518616 |

Table S1. Information on genomic specimens sequenced.

a. Samples made with DNA extracted from different tissues of the same individual.
